# Supplementary material for: Potential for Biomethanisation of CO2 from Anaerobic Digestion of Organic Wastes in the United Kingdom
Source: MDPI journal article supplement (doi:10.3390/pr10061202), 2022-06-16
Supplement: s1 [file s1]

## Supplementary Materials

### Potential for biomethanisation of CO<sub>2</sub> from anaerobic digestion of organic wastes in the UK'

Angela Bywater <sup>1,\*</sup> Sonia Heaven <sup>1,\*</sup>, Yue Zhang <sup>1</sup> and Charles J. Banks <sup>1</sup>

<sup>1</sup> Water and Environmental Engineering Group, University of Southampton, Southampton SO16 7QF, UK

\* Correspondence: a.m.bywater@soton.ac.uk; s.heaven@soton.ac.uk

#### S1. Assessment of performance data for CO<sub>2</sub> biomethanisation of organic feedstocks

Tables S1-S4 summarise the available data on CO<sub>2</sub> biomethanisation of organic feedstocks by feedstock type. The following nomenclature and definitions were used to obtain these values, which may therefore differ slightly in some cases from those reported in the original paper. The significance of some parameters is discussed briefly below.

**Nomenclature:** NB parameters are listed in the order in which they appear in Tables S1-S4

| <i>Acronym</i>                | <i>Definition</i>                                                                                                                                                                                                                                                                                                                                             | <i>Unit</i>                                                                       |
|-------------------------------|---------------------------------------------------------------------------------------------------------------------------------------------------------------------------------------------------------------------------------------------------------------------------------------------------------------------------------------------------------------|-----------------------------------------------------------------------------------|
| <i>OLR</i>                    | Organic loading rate, expressed as the mass of VS or COD added per unit of digester working volume per unit time                                                                                                                                                                                                                                              | g VS L <sup>-1</sup> day <sup>-1</sup> or g COD L <sup>-1</sup> day <sup>-1</sup> |
| <i>HRT</i>                    | Hydraulic retention time, as reported or calculated from digester working volume divided by the daily volume of feed added                                                                                                                                                                                                                                    | days                                                                              |
| <i>H<sub>2</sub> input</i>    | Volume of H <sub>2</sub> added per unit of digester working volume per unit time                                                                                                                                                                                                                                                                              | L H <sub>2</sub> L <sup>-1</sup> day <sup>-1</sup>                                |
| <i>CO<sub>2</sub> input</i> * | Volume of exogenous CO <sub>2</sub> added, per unit of digester working volume per unit time.                                                                                                                                                                                                                                                                 | L CO <sub>2</sub> L <sup>-1</sup> day <sup>-1</sup>                               |
| <i>SMP</i>                    | Specific methane production, defined as the volume of CH <sub>4</sub> produced from both anaerobic degradation of organic material and CO <sub>2</sub> biomethanisation (including from exogenous CO <sub>2</sub> where applicable), per unit of organic feed added                                                                                           | L CH <sub>4</sub> g <sup>-1</sup> VS or L CH <sub>4</sub> g <sup>-1</sup> COD     |
| <i>SMP<sub>org</sub></i> *    | Volume of CH <sub>4</sub> produced from anaerobic degradation of organic material per unit of organic feed added. Values taken either from a digester without H <sub>2</sub> addition operating in parallel with the experimental digester(s), or from a baseline period with no H <sub>2</sub> addition: these conditions are defined as control conditions. | L CH <sub>4</sub> g <sup>-1</sup> VS or L CH <sub>4</sub> g <sup>-1</sup> COD     |
| <i>SMP<sub>H2</sub></i>       | Volume of CH <sub>4</sub> assumed to be produced from exogenous H <sub>2</sub> via CO <sub>2</sub> biomethanisation, per unit of organic feed added. Taken as the difference between <i>SMP</i> and <i>SMP<sub>org</sub></i> .                                                                                                                                | L CH <sub>4</sub> g <sup>-1</sup> VS or L CH <sub>4</sub> g <sup>-1</sup> COD     |
| <i>SMP<sub>inc</sub></i>      | Proportional increase in methane production that is attributed to CO <sub>2</sub> biomethanisation, equal to <i>SMP<sub>H2</sub></i> divided by <i>SMP<sub>org</sub></i> .                                                                                                                                                                                    | %                                                                                 |
| <i>VMP</i>                    | Volumetric methane production, defined as the volume of CH <sub>4</sub> produced from both anaerobic degradation of organic material and CO <sub>2</sub> biomethanisation (including from exogenous CO <sub>2</sub> where applicable), per unit of digester working volume per unit time                                                                      | L CH <sub>4</sub> L <sup>-1</sup> day <sup>-1</sup>                               |

|                        |                                                                                                                                                                                                                                                                      |                                                                                                           |
|------------------------|----------------------------------------------------------------------------------------------------------------------------------------------------------------------------------------------------------------------------------------------------------------------|-----------------------------------------------------------------------------------------------------------|
| $VMP_{org}^*$          | Volume of CH <sub>4</sub> produced from anaerobic degradation of organic material, per unit of digester working volume per unit time, with values taken under control conditions as defined for $SMP_{org}$ .                                                        | L CH <sub>4</sub> L <sup>-1</sup> day <sup>-1</sup>                                                       |
| $MER$                  | Methane Evolution Rate, the volume of CH <sub>4</sub> assumed to be produced from CO <sub>2</sub> biomethanisation via exogenous H <sub>2</sub> addition, per unit of digester working volume per unit time. Taken as the difference between $VMP$ and $VMP_{org}$ . | L CH <sub>4</sub> L <sup>-1</sup> day <sup>-1</sup>                                                       |
| $VCO_2^*$              | Volume of CO <sub>2</sub> produced, from both anaerobic degradation of organic material and CO <sub>2</sub> biomethanisation (including exogenous CO <sub>2</sub> where applicable), per unit of digester working volume per unit time.                              | L CH <sub>4</sub> L <sup>-1</sup> day <sup>-1</sup>                                                       |
| $VCO_{2org}^*$         | Volume of CO <sub>2</sub> produced from anaerobic degradation of organic material, per unit of digester working volume per unit time, with values taken from control conditions as defined for $SMP_{org}$ .                                                         | L CH <sub>4</sub> L <sup>-1</sup> day <sup>-1</sup>                                                       |
| $CRR^*$                | CO <sub>2</sub> Removal Rate, the volume of CO <sub>2</sub> assumed to be removed via CO <sub>2</sub> biomethanisation, per unit of digester working volume per unit time. Taken as the difference between $VCO_2$ and $VCO_{2org}$ .                                | L CO <sub>2</sub> L <sup>-1</sup> day <sup>-1</sup>                                                       |
| $VGP^*$                | Total volume of output gas, including H <sub>2</sub> , per unit of digester working volume per unit time.                                                                                                                                                            | L L <sup>-1</sup> day <sup>-1</sup>                                                                       |
| $VBP^*$                | Sum of $VMP$ and $VCO_2$                                                                                                                                                                                                                                             | L biogas L <sup>-1</sup> day <sup>-1</sup>                                                                |
| $VBP_{org}^*$          | Sum of $VMP$ and $VCO_{2org}$                                                                                                                                                                                                                                        | L biogas L <sup>-1</sup> day <sup>-1</sup>                                                                |
| $CH_4, CO_2, H_2$      | Concentrations of CH <sub>4</sub> , CO <sub>2</sub> and H <sub>2</sub> , respectively, in the output gas on a volumetric basis                                                                                                                                       | %                                                                                                         |
| $pH$                   | pH value of digestate                                                                                                                                                                                                                                                | -                                                                                                         |
| $H_2/CO_2$             | Ratio of H <sub>2</sub> added to experimental digester and CO <sub>2</sub> production of control, taken as $H_2 input/VCO_{2org}$ for the relevant conditions.                                                                                                       | -                                                                                                         |
| $H_2 output^*$         | Volume of H <sub>2</sub> leaving in gaseous form, per unit of digester working volume per unit time. Reported or calculated from output gas volume and concentration.                                                                                                | L H <sub>2</sub> L <sup>-1</sup> day <sup>-1</sup>                                                        |
| $H_2 trans$            | Volume of H <sub>2</sub> successfully transferred from gaseous phase into the digester, per unit of digester working volume per unit time. Taken as $(H_2 input - H_2 output)$                                                                                       | L H <sub>2</sub> L <sup>-1</sup> day <sup>-1</sup>                                                        |
| $E$                    | H <sub>2</sub> transfer efficiency, the proportion of H <sub>2</sub> successfully transferred from the gaseous phase into the digester, equal to $H_2 trans/H_2 input$                                                                                               | %                                                                                                         |
| $Exp\ MER, Exp\ CRR^*$ | Theoretical expected values for $MER$ and $CRR$ equal to the amount of H <sub>2</sub> transferred divided by 4, i.e. $H_2 trans/4$ , based on stoichiometry.                                                                                                         | L CH <sub>4</sub> L <sup>-1</sup> day <sup>-1</sup> , L CO <sub>2</sub> L <sup>-1</sup> day <sup>-1</sup> |

\* Not shown in Table S1-S4

The  $H_2/CO_2$  ratio compares the H<sub>2</sub> input with the amount of CO<sub>2</sub> produced by the control, and thus provides an indication of the proportion of endogenous CO<sub>2</sub> that could be converted. This ratio is used as a control parameter in some studies (e.g. [23, 31, 45, 68, 75, 76], and is sometimes reported instead of H<sub>2</sub> input. Experimental work at ratios below 4 may not give the maximum achievable biogas methane content, as in principle there is insufficient H<sub>2</sub> for stoichiometric conversion of the available CO<sub>2</sub>.

The H<sub>2</sub> transfer efficiency  $E$  indicates the proportion of H<sub>2</sub> added that is transferred and utilised in some way, rather than passing straight out of the digester in the output gas: it thus provides an

indicator of effective utilisation of exogenous  $H_2$ . This is an important consideration given both the energy required for  $H_2$  production, and the fact that it represents a resource for which competing applications may exist.

In addition to the parameters shown above, a number of ratios were considered as they provide some insight on process and performance. The ratio  $MER/Exp\ MER$  indicates the proportion of the  $H_2$  transferred that is being utilised for something other than  $CH_4$  production. Observed values in Tables S1-S4 can be placed in 3 groups: where the value is  $< 1$ , some of the transferred  $H_2$  is being diverted to products other than methane, such as biomass growth or volatile fatty acid (VFA) production (e.g. [41]). Values close to 1 indicate an effective process from the viewpoint of biogas upgrading (e.g. [11, 28]). Values  $> 1$  may indicate non-steady-state operation e.g. with methane produced from consumption of previously accumulated VFA (e.g. [61]); or from enhanced degradation of organic substrate, as discussed below and in the main text.

The ratios  $H_2\ trans/MER$  and  $H_2\ trans/CRR$  are closely related to  $MER/Exp\ MER$  and  $MER/Exp\ CRR$ , respectively, and provide another indication of how much  $H_2$  is being combined with  $CO_2$  to produce  $CH_4$ . The reaction stoichiometry from Equation 1 in the main text suggests a value of 4, but in practice both ratios can diverge from this. Based on theoretical pathway analysis, around 5% of  $H_2$  is used in microbial biomass production (Thauer, 2012). The value of  $H_2\ trans/MER$  rises when  $H_2$  is used for other purposes. The behaviour of  $H_2\ trans/CRR$  is more complicated, as it depends on the nature of products other than  $CH_4$ . If, for example, acetic acid is produced according to the equation  $2\ CO_2 + 4\ H_2 = CH_3COOH + 2H_2O$ , the stoichiometric ratio between  $H_2$  and  $CO_2$  is 2. If microbial biomass is assumed to have an empirical formula of  $C_5H_7NO_2$ , the anabolic reaction is  $5\ CO_2 + 10\ H_2 + NH_4^+ = C_5H_7NO_2 + 8\ H_2O + H^+$  and the ratio of  $H_2$  to  $CO_2$  is again 2. In each case carbon is diverted away from  $CH_4$  production and the ratio  $H_2\ trans/CRR$  falls. In addition  $CRR$  is calculated from  $VCO_2$  and  $VCO_{2org}$  and depends upon gaseous  $CO_2$  concentrations; but on biomethanisation of headspace  $CO_2$  a proportion of the  $CO_2$  dissolved in the digestate will be released, which may increase the value of  $H_2\ trans/CRR$ . More detailed calculations and mass balances of this type are provided by several authors (e.g. [6, 26, 77]).

The ratio  $MER/VCO_{2org}$  is a measure of how much of the  $CO_2$  produced in the control without  $H_2$  addition has theoretically been converted in an experimental digester. As noted in the main text, in several cases the value is greater than 1, which would imply more than 100% conversion if the available  $CO_2$  has not changed. This may reflect an increase in underlying  $VMP_{org}$ , or in  $VCO_2$  if there is sufficient  $H_2$  for conversion, or both. The ratio  $VBP/VBP_{org}$  indicates whether VBP appears to have changed as a result of  $CO_2$  biomethanisation, and is also greater than 1 in some cases. In some of these cases, the experimental design was sequential, relying on a previous baseline for control values (e.g., [21, 22, 24, 27, 33, 57, 61, 66]), and the increase in VBP could therefore possibly reflect changes in feedstock properties and/or acclimatisation over time; however the same phenomenon is also seen in studies with a parallel control (e.g., [29, 43, 45, 47, 68, 74]).

The ratio  $CRR/Exp\ CRR$  should be above 1 when there is microbial biomass or acetic acid production, and below 1 if biogas production from the organic substrate increases during  $CO_2$  biomethanisation. A value of  $MER/CRR$  close to 1 suggests that the majority of  $CO_2$  removed is being converted to  $CH_4$ . This ratio is generally expected to be  $< 1$  as some carbon will be converted into biomass, but could increase when  $CO_2$  biomethanisation causes dissolved  $CO_2$  to come out of solution.

All comparisons between values and ratios presented in Tables S1-S4 should be regarded with caution, as they come from studies carried out under different conditions and are based on simplifying assumptions; but these parameters nevertheless provide some useful and intriguing insights indicating where further research may be needed. Data used for these tables is available at <http://doi.org/10.5258/SOTON/D2241>, and the authors welcome any comments and corrections.

**Table S1 Performance data for CO<sub>2</sub> biomethanisation of livestock manures** (for notes on Tables see Table S4)

|                           | Ref            | Substrate      | Temp | Reactor      | Total vol   | Working vol | Mixing          | Gas recirc | Injector       | Exp'tl design | Varied                          | Note                                                                                                                                               |
|---------------------------|----------------|----------------|------|--------------|-------------|-------------|-----------------|------------|----------------|---------------|---------------------------------|----------------------------------------------------------------------------------------------------------------------------------------------------|
|                           |                |                | oC   |              | L           | L           |                 |            |                |               |                                 |                                                                                                                                                    |
| <b>Livestock manures</b>  | <b>Manures</b> |                |      |              |             |             |                 |            |                |               |                                 |                                                                                                                                                    |
| Luo et al., 2012a         | 1              | CM             | 55   | CSTR         | 4.5         | 3.5         | Mechanical      | No         | Ceramic        | Parallel      | With/without H2                 | -<br>-                                                                                                                                             |
| Bassani et al., 2015      | 21             | CM             | 35   | 2-stage CSTR | n/r         | 1.5 and 2   | Magnetic        | No         | Diffuser       | Sequential    | Temp - meso and thermo          | Control period<br>-<br>Control period<br>-                                                                                                         |
| Treu et al., 2018         | 22             | CM             | 55   | 2-stage CSTR | n/r         | 1.5 and 2   | Stirred         | No         | Diffuser       | Sequential    | H2 addition                     | Control period<br>Initial value<br>After 2 years                                                                                                   |
| Wahid and Horn, 2021a     | 23             | CM             | 55   | 2-stage CSTR | 10 and 10   | 6 and 6     | Impeller        | Yes        | Diffuser       | Sequential    | Mixing and gas recirc           | -<br>Highest SMP etc                                                                                                                               |
| Lebranchu et al., 2020    | 24             | CM             | 40   | CSTR         | 142         | 100         | Helical         | No         | Silicone tube  | Sequential    | H2 addition                     | Control period<br>Best performance<br>-                                                                                                            |
| Zhu et al., 2019a         | 25             | PM             | 55   | CSTR         | n/r         | 11.2        | Mechanical      | No         | Distributor    | Sequential    | Mixing, sodium formate          | Control period<br>Continuous mixing<br>Continuous mixing, HCOONa                                                                                   |
| Zhu et al., 2019b         | 26             | PM             | 35   | CSTR         | n/r         | 11.2        | Mechanical      | No         | Distributor    | Sequential    | Temperature and mixing          | Meso - intermittent mixing<br>Meso - intermittent mixing<br>Meso - continuous mixing<br>Thermo - intermittent mixing<br>Thermo - continuous mixing |
| Zhu et al., 2020          | 27             | PM             | 35   | CSTR         | n/r         | 11.6        | Mechanical      | No         | Distributor    | Sequential    | H2 addition and mixing          | Control period<br>Low H2/CO2<br>Intermittent mix                                                                                                   |
| Luo et al., 2013a         | 29             | CM + whey      | 55   | CSTR         | 1           | 0.6         | Magnetic        | No         | Column/ceramic | Parallel      | Diffuser and mixing speed       | 150 rpm, column<br>150 rpm, column<br>300 rpm, ceramic<br>300 rpm, ceramic<br>150 rpm, ceramic<br>150 rpm, ceramic                                 |
| Luo and Angelidaki, 2013b | 30             | CM + whey      | 55   | CSTR         | 1           | 0.6         | Magnetic        | No         | HFM            | Parallel      | H2 addition                     | Control reactor<br>Best performance                                                                                                                |
| Wahid and Horn, 2021b     | 31             | CM + whey      | 55   | 2-stage CSTR | 10 and 10   | 6 and 6     | Impeller        | Yes        | Diffuser       | Sequential    | Stirring, CM/W ratio, Feed freq | CM/W 9, 80 rpm, daily feed<br>CM/W 9, 80 rpm, daily feed                                                                                           |
| Khan et al., 2022         | 33             | CM + veg waste | 37   | 2-stage      | 2.5 (total) | 2 (total)   | None/gas recirc | Yes        | Sparger        | Sequential    | H2 and gas recirc rates         | No recirc<br>No recirc<br>With recirc<br>With recirc                                                                                               |

**Table S1 ctd Performance data for CO<sub>2</sub> biomethanisation of livestock manures (for notes on Tables see Table S4)**

| Ref Case    | OLR<br>g VS/L-day | HRT<br>days | H <sub>2</sub> input<br>L/L-day | SMP<br>L/g VS | SMP <sub>H<sub>2</sub></sub><br>L/g VS | SMP <sub>inc</sub><br>% | VMP<br>L/L-day | MER<br>L/L-day | CH4<br>% | CO2<br>% | H2<br>% | pH   | CRR   | H2/<br>CO2 | H2 trans/<br>input | MER/<br>Exp MER | CRR/<br>Exp CRR | MER/<br>CRR | MER/<br>VCO2org | VBP/<br>VBPorg | H2 trans/<br>MER | H2 trans/<br>CRR |
|-------------|-------------------|-------------|---------------------------------|---------------|----------------------------------------|-------------------------|----------------|----------------|----------|----------|---------|------|-------|------------|--------------------|-----------------|-----------------|-------------|-----------------|----------------|------------------|------------------|
| 1 No H2     | 6.2               | 14.6        |                                 | 0.060         |                                        |                         | 0.37           |                | 62.0     | 38.0     |         | 8.00 |       |            |                    |                 |                 |             |                 |                |                  |                  |
| With H2     |                   |             | 0.69                            | 0.073         | 0.013                                  | 22%                     | 0.45           | 0.08           | 65.0     | 15.0     | 20.0    | 8.30 | 0.12  | 3.00       | 0.80               | 0.60            | 0.91            | 0.65        | 0.36            | 0.93           | 6.7              | 4.4              |
| 21 No H2    | 0.6               | 25 and 33   |                                 | 0.111         |                                        |                         | 0.07           |                | 69.7     | 30.3     |         | 7.73 |       |            |                    |                 |                 |             |                 |                |                  |                  |
| With H2     |                   |             | 0.19                            | 0.168         | 0.057                                  | 51%                     | 0.10           | 0.03           | 88.9     | 8.8      | 2.3     | 8.17 | 0.02  | 6.74       | 0.99               | 0.72            | 0.39            | 1.83        | 1.19            | 1.16           | 5.6              | 10.2             |
| No H2       | 1                 | 15 and 20   |                                 | 0.249         |                                        |                         | 0.25           |                | 67.1     | 32.9     |         | 7.89 |       |            |                    |                 |                 |             |                 |                |                  |                  |
| With H2     |                   |             | 0.51                            | 0.359         | 0.110                                  | 44%                     | 0.36           | 0.11           | 85.1     | 6.6      | 8.3     | 8.49 | 0.09  | 4.21       | 0.94               | 0.94            | 0.78            | 1.20        | 0.93            | 1.05           | 4.3              | 5.1              |
| 22 No H2    | 1.0               | 15 and 20   |                                 | 0.262         |                                        |                         | 0.26           |                | 66.9     | 33.1     |         | 7.90 |       |            |                    |                 |                 |             |                 |                |                  |                  |
| With H2     |                   |             | 0.51                            | 0.376         | 0.114                                  | 44%                     | 0.37           | 0.11           | 86.5     | 6.6      | 6.9     | 8.49 | 0.10  | 4.00       | 0.94               | 0.48            | 0.42            | 1.13        | 0.88            | 1.11           | 4.3              | 4.8              |
| With H2     |                   |             | 0.51                            | 0.500         | 0.238                                  | 91%                     | 0.34           | 0.09           | 98.7     | 0.9      | 0.4     | 8.71 | 0.12  | 4.00       | 0.99               | 0.34            | 0.50            | 0.68        | 0.66            | 0.82           | 6.0              | 4.1              |
| 23 No H2    | 3.1               | 15 and 20   |                                 | 0.217         |                                        |                         | 0.67           |                | 62.2     | 37.8     |         | 7.86 |       |            |                    |                 |                 |             |                 |                |                  |                  |
| With H2     |                   |             | 1.66                            | 0.411         | 0.194                                  | 90%                     | 0.90           | 0.23           | 40.3     | 11.9     | 47.7    | 8.41 | -0.03 | 4.00       | 0.36               | 2.56            | -0.37           | -6.87       | 0.57            | 1.08           | 6.6              | -17.8            |
| 24 No H2    | 3.85              | 28          |                                 | 0.186         |                                        |                         | 0.72           |                | 57.4     | 42.4     |         | 7.45 |       |            |                    |                 |                 |             |                 |                |                  |                  |
| With H2     |                   |             | 0.45                            | 0.221         | 0.035                                  | 19%                     | 0.85           | 0.14           | 68.3     | 31.6     | 0.0     | 7.70 | 0.14  | 0.84       | 0.97               | 1.25            | 1.25            | 1.00        | 0.26            | 1.00           | 3.2              | 3.2              |
| With H2+CO2 |                   |             | 0.60                            | 0.236         | 0.050                                  | 27%                     | 0.91           | 0.19           | 67.5     | 32.5     | 0.0     | 7.80 | 0.09  | 1.04       | 1.00               | 1.26            | 0.61            | 2.07        | 0.36            | 1.08           | 3.2              | 6.5              |
| 25 No H2    | 2                 | 25          |                                 | 0.222         |                                        |                         | 0.44           |                | 66.0     | 34.0     |         | 7.63 |       |            |                    |                 |                 |             |                 |                |                  |                  |
| With H2     |                   |             | 0.95                            | 0.253         | 0.031                                  | 13%                     | 0.51           | 0.02           | 46.9     | 14.7     | 38.4    | 7.73 | 0.07  | 4.15       | 0.56               | 2.18            | 0.53            | 0.86        | 0.27            | 0.99           | 8.7              | 7.6              |
| With H2     |                   |             | 0.95                            | 0.292         | 0.069                                  | 27%                     | 0.58           | 0.03           | 54.8     | 11.5     | 33.7    | 7.85 | 0.11  | 4.15       | 0.62               | 1.07            | 0.72            | 1.31        | 0.61            | 1.05           | 4.3              | 5.6              |
| 26 No H2    | 2                 | 25          |                                 | 0.197         |                                        |                         | 0.10           |                | 62.0     | 38.0     |         | 7.36 |       |            |                    |                 |                 |             |                 |                |                  |                  |
| With H2     | 2                 |             | 0.13                            | 0.200         | 0.003                                  | 2%                      | 0.10           | 0.00           | 59.8     | 32.2     | 8.0     | 7.40 | 0.03  | 0.55       | 0.60               | 3.35            | 1.30            | 0.23        | 0.02            | 0.97           | 13.4             | 3.1              |
| With H2     | 2                 |             | 0.64                            | 0.210         | 0.013                                  | 5%                      | 0.11           | 0.01           | 39.1     | 16.8     | 44.1    | 7.59 | 0.06  | 2.66       | 0.26               | 1.63            | 1.45            | 0.42        | 0.11            | 0.94           | 6.5              | 2.8              |
| No H2       | 2                 |             |                                 | 0.222         | 0.025                                  | 12%                     | 0.11           | 0.01           | 66.0     | 34.0     |         | 7.63 |       |            |                    |                 |                 |             |                 |                |                  |                  |
| With H2     | 2                 |             | 0.66                            | 0.245         | 0.048                                  | 20%                     | 0.12           | 0.02           | 68.3     | 19.3     | 12.4    | 7.77 | 0.09  | 2.89       | 0.86               | 3.11            | 0.63            | 0.51        | 0.20            | 0.93           | 12.4             | 6.3              |
| 27 No H2    | 2                 | 25          |                                 | 0.189         |                                        |                         | 0.39           |                | 62.0     | 38.0     |         | 7.36 |       |            |                    |                 |                 |             |                 |                |                  |                  |
| With H2     |                   |             | 0.19                            | 0.200         | 0.011                                  | 6%                      | 0.42           | 0.03           | 55.8     | 30.0     | 14.2    | 7.42 | 0.01  | 0.78       | 0.43               | 0.66            | 0.65            | 2.33        | 0.13            | 1.04           | 2.6              | 6.2              |
| With H2     |                   |             | 0.89                            | 0.245         | 0.055                                  | 29%                     | 0.51           | 0.12           | 32.5     | 16.7     | 50.8    | 7.63 | -0.02 | 3.74       | 0.11               | 0.20            | -0.97           | -5.06       | 0.50            | 1.25           | 0.8              | -4.1             |
| 29 No H2    | 1.67              | 15          |                                 | 0.287         |                                        |                         | 0.48           |                | 55.0     | 45.0     | 0.0     | 7.28 |       |            |                    |                 |                 |             |                 |                |                  |                  |
| With H2     |                   |             | 1.70                            | 0.452         | 0.166                                  | 58%                     | 0.76           | 0.28           | 53.0     | 13.0     | 34.0    | 7.74 | 0.21  | 4.32       | 0.71               | 0.91            | 0.69            | 1.33        | 0.70            | 1.08           | 4.4              | 5.8              |
| No H2       | 1.67              | 15          |                                 | 0.299         |                                        |                         | 0.50           |                | 56.0     | 44.0     | 0.0     | 7.33 |       |            |                    |                 |                 |             |                 |                |                  |                  |
| With H2     |                   |             | 1.70                            | 0.501         | 0.202                                  | 67%                     | 0.84           | 0.34           | 68.0     | 8.8      | 23.2    | 7.84 | 0.29  | 4.32       | 0.83               | 0.96            | 0.81            | 1.19        | 0.86            | 1.06           | 4.2              | 5.0              |
| No H2       | 1.67              | 15          |                                 | 0.295         |                                        |                         | 0.49           |                | 56.7     | 43.3     | 0.0     | 7.31 |       |            |                    |                 |                 |             |                 |                |                  |                  |
| With H2     |                   |             | 1.70                            | 0.529         | 0.234                                  | 79%                     | 0.89           | 0.39           | 75.0     | 6.6      | 18.4    | 7.89 | 0.30  | 4.50       | 0.87               | 1.05            | 0.81            | 1.30        | 1.03            | 1.10           | 3.8              | 4.9              |
| 30 No H2    | 1.67              | 15          |                                 | 0.288         |                                        |                         | 0.48           |                | 55.4     | 44.6     |         | 7.30 |       |            |                    |                 |                 |             |                 |                |                  |                  |
| With H2     |                   |             | 1.76                            | 0.516         | 0.265                                  | 92%                     | 0.86           | 0.38           | 96.1     | 3.9      | 0.0     | 8.31 | 0.35  | 4.56       | 1.00               | 1.00            | 0.80            | 1.26        | 1.15            | 1.03           | 4.0              | 5.0              |
| 31 No H2    | 4.13              | 20          |                                 | 0.144         |                                        |                         | 0.59           |                | 59.1     | 40.9     |         | 7.94 |       |            |                    |                 |                 |             |                 |                |                  |                  |
| With H2     |                   |             | 1.44                            | 0.165         | 0.031                                  | 23%                     | 0.68           | 0.13           | 38.7     | 19.1     | 42.2    | 7.95 | 0.07  | 3.54       | 0.48               | 0.52            | 0.41            | 1.28        | 0.22            | 1.02           | 7.7              | 9.8              |
| 33 No H2    | 3.5               | 10          |                                 | 0.300         |                                        |                         | 1.05           |                | 73       | 27       |         | 7.20 |       |            |                    |                 |                 |             |                 |                |                  |                  |
| With H2     | 3.5               | 10          | 1.60                            | 0.500         | 0.200                                  | 67%                     | 1.75           | 0.7            | 63       | 5        | 31.6    | 7.00 | 0.24  | 4.12       | 0.45               | 3.89            | 1.31            | 2.96        | 1.80            | 1.36           | 1.0              | 3.0              |
| No H2       | 3.5               | 10          |                                 | 0.425         |                                        |                         | 1.49           |                | 76       | 24       |         | 7.30 |       |            |                    |                 |                 |             |                 |                |                  |                  |
| With H2     | 3.5               | 10          | 1.60                            | 0.897         | 0.472                                  | 157%                    | 3.14           | 1.652          | 96       | 1        | 3.1     | 7.20 | 0.44  | 3.41       | 0.94               | 4.41            | 1.17            | 3.77        | 3.52            | 3.52           | 0.9              | 3.4              |

**Table S2 Performance data for CO<sub>2</sub> biomethanisation of crops and agro-wastes** (for notes on Tables see Table S4)

| Ref                          | Substrate                                       | Temp<br>oC | Reactor          | Total vol<br>L | Working vol<br>L  | Mixing      | Gas recirc | Injector                                      | Exp'tl design | Varied                                | Note                                                                                              |
|------------------------------|-------------------------------------------------|------------|------------------|----------------|-------------------|-------------|------------|-----------------------------------------------|---------------|---------------------------------------|---------------------------------------------------------------------------------------------------|
| <b>Crops and agro-wastes</b> |                                                 |            |                  |                |                   |             |            |                                               |               |                                       |                                                                                                   |
| Voelklein et al., 2019       | 42 Grass silage                                 | 55         | CSTR             | 9.5            | n/r               | Mechanical  | Yes        | Low capacity diffuser<br><br>Ceramic diffuser | Sequential    | Diffuser type                         | Control period<br>Low capacity diffuser<br>Control period<br>Ceramic diffuser                     |
| Illi et al., 2021            | 43 Maize silage + sugar beet<br>silage effluent | 37         | Anaerobic filter | 130            | 95                | Pump        | Yes?       | Venturi                                       | Parallel      | H <sub>2</sub> ratio                  | Control reactor<br><br>H <sub>2</sub> /CO <sub>2</sub> = 2<br>H <sub>2</sub> /CO <sub>2</sub> = 4 |
| Schönberg and Busch, 2012    | 44 Maize silage hydrolysate                     | 55         | 2-stage          | n/r            | 200 + 145 (exptl) | Percolation | No?        | Injector                                      | Parallel      | Hydrolysis conditions                 | Hydrolysis at 55 oC<br>-<br>Hydrolysis at 60 oC<br>-<br>Hydrolysis at 60 oC<br>-                  |
| Agneessens et al., 2017      | 45 Mixed agrowaste digestate                    | 38         | CSTR             | 2              | 0.3               | Stirred     | No         | Headspace - pulsed                            | Parallel      | H <sub>2</sub> /CO <sub>2</sub> ratio | Control reactor<br>H <sub>2</sub> /CO <sub>2</sub> = 6                                            |
| Agneessens et al., 2018      | 47 Mixed agrowaste digestate                    | 38         | CSTR             | 1.4            | 0.3               | Stirred     | No         | Headspace - pulsed                            | Parallel      | OLR and H <sub>2</sub> addition       | OLR 2<br>>25% CO <sub>2</sub> , OLR 2, inj 1<br>OLR 2<br><7% CO <sub>2</sub> , OLR 2, inj 10      |

**Table S2 ctd Performance data for CO<sub>2</sub> biomethanisation of crops and agro-wastes** (for notes on Tables see Table S4)

| Ref | Case                | OLR<br>g VS/L-day | HRT<br>days | H <sub>2</sub> input<br>L/L-day | SMP<br>L/g VS | SMP <sub>H<sub>2</sub></sub><br>L/g VS | SMP <sub>inc</sub><br>% | VMP<br>L/L-day | MER<br>L/L-day | CH <sub>4</sub><br>% | CO <sub>2</sub><br>% | H <sub>2</sub><br>% | pH   | CRR   | H <sub>2</sub> /CO <sub>2</sub> | H <sub>2</sub> trans/<br>input | MER/<br>Exp MER | CRR/<br>Exp CRR | MER/<br>CRR | MER/<br>VCO <sub>2</sub> org | VBP/<br>VBPorg | H <sub>2</sub> trans/<br>MER | H <sub>2</sub> trans/<br>CRR |     |
|-----|---------------------|-------------------|-------------|---------------------------------|---------------|----------------------------------------|-------------------------|----------------|----------------|----------------------|----------------------|---------------------|------|-------|---------------------------------|--------------------------------|-----------------|-----------------|-------------|------------------------------|----------------|------------------------------|------------------------------|-----|
| 42  | No H <sub>2</sub>   | 4.0               | 46          |                                 | 0.388         |                                        |                         | 1.53           |                | 54.8                 | 45.2                 | 0.0                 | 7.81 |       |                                 |                                |                 |                 |             |                              |                |                              |                              |     |
|     | With H <sub>2</sub> |                   |             | 5.05                            | 0.461         | 0.073                                  | 19%                     | 1.82           | 0.29           | 32.1                 | 11.4                 | 56.5                | 7.97 | 0.62  | 4.00                            | 0.37                           | 0.63            | 1.33            | 0.47        | 0.23                         | 0.88           | 6.4                          | 1.2                          |     |
|     | No H <sub>2</sub>   |                   |             |                                 | 0.382         |                                        |                         | 1.51           |                | 53.2                 | 46.8                 |                     | 7.89 |       |                                 |                                |                 |                 |             |                              |                |                              |                              |     |
|     | With H <sub>2</sub> |                   |             | 5.29                            | 0.640         | 0.258                                  | 68%                     | 2.52           | 0.99           | 60.3                 | 5.1                  | 34.6                | 8.37 | 1.12  | 3.98                            | 0.73                           | 1.05            | 1.16            | 0.91        | 0.76                         | 0.96           | 3.8                          | 2.7                          |     |
| 43  | No H <sub>2</sub>   | 2.92              | 17          |                                 | 0.310         |                                        |                         | 0.91           |                | 66.1                 | 27.9                 |                     | 7.91 |       |                                 |                                |                 |                 |             |                              |                |                              |                              |     |
|     | With H <sub>2</sub> | 3.00              | 17          | 0.75                            | 0.350         | 0.040                                  | 13%                     | 1.05           | 0.14           | 62.7                 | 18.4                 | 11.0                | 8.17 | 0.07  | 1.95                            | 0.76                           | 0.99            | 0.53            | 1.87        | 0.36                         | 1.05           | 4.0                          | 7.6                          |     |
|     | With H <sub>2</sub> | 3.53              | 16          | 1.51                            | 0.350         | 0.040                                  | 13%                     | 1.20           | 0.29           | 56.7                 | 12.0                 | 27.0                | 8.55 | 0.13  | 3.94                            | 0.62                           | 1.23            | 0.55            | 2.25        | 0.76                         | 1.12           | 3.2                          | 7.3                          |     |
| 44  | No H <sub>2</sub>   | 1.02              | 22          |                                 | 0.28          |                                        |                         | 0.29           | n/a            | norm                 | norm                 | n/r                 | n/r  |       |                                 |                                |                 |                 |             |                              |                |                              |                              |     |
|     | With H <sub>2</sub> | 1.12              | 22          | 2.67                            | 0.31          | 0.025                                  | 9%                      | 0.34           | n/a            | norm                 | norm                 | n/r                 | n/r  | -0.02 | n/r                             | n/r                            | 0.08            | n/r             | n/r         | 0.17                         | n/r            | n/r                          | n/r                          | n/r |
|     | No H <sub>2</sub>   | 0.89              | 24          |                                 | 0.31          |                                        |                         | 0.27           | n/a            | norm                 | norm                 | n/r                 | n/r  |       |                                 |                                |                 |                 |             |                              |                |                              |                              |     |
|     | With H <sub>2</sub> | 1.01              | 24          | 4.57                            | 0.31          | 0.007                                  | 2%                      | 0.32           | n/a            | norm                 | norm                 | n/r                 | n/r  | 0.04  | n/r                             | n/r                            | 0.04            | n/r             | n/r         | 0.11                         | n/r            | n/r                          | n/r                          | n/r |
|     | No H <sub>2</sub>   | 1.27              | 46          |                                 | 0.38          |                                        |                         | 0.49           | n/a            | norm                 | norm                 | n/r                 | n/r  |       |                                 |                                |                 |                 |             |                              |                |                              |                              |     |
|     | With H <sub>2</sub> | 1.39              | 46          | 10.95                           | 0.41          | 0.022                                  | 8%                      | 0.56           | n/a            | norm                 | norm                 | n/r                 | n/r  | -0.03 | n/r                             | n/r                            | 0.03            | n/r             | n/r         | 0.15                         | n/r            | n/r                          | n/r                          | n/r |
| 45  | No H <sub>2</sub>   | 0.77              | 20          |                                 | 0.293         |                                        |                         | 0.23           |                | 59.4                 | 40.7                 | n/a                 | 7.91 |       |                                 |                                |                 |                 |             |                              |                |                              |                              |     |
|     | With H <sub>2</sub> | 0.77              | 20          | 0.93                            | 0.571         | 0.214                                  | 73%                     | 0.44           | 0.21           | 100.0                | 0.0                  | n/a                 | 7.91 | 0.15  | 6.00                            | 1.01                           | 0.94            | 0.68            | 1.39        | 1.39                         | 1.16           | 4.2                          | 5.8                          |     |
| 47  | No H <sub>2</sub>   | 2.0               | 20          |                                 | 0.129         |                                        |                         | 0.26           |                | 56.0                 | 44.0                 | n/a                 | 7.92 |       |                                 |                                |                 |                 |             |                              |                |                              |                              |     |
|     | With H <sub>2</sub> | 2.0               | 20          | 1.30                            | 0.230         | 0.102                                  | 79%                     | 0.46           | 0.20           | 94.0                 | 6.0                  | n/a                 | 7.92 | 0.17  | 6.42                            | 1.00                           | 0.62            | 3.61            | 1.17        | 1.00                         | 1.07           | 6.4                          | 7.5                          |     |
|     | No H <sub>2</sub>   | 2.0               | 20          |                                 | 0.077         |                                        |                         | 0.15           |                | 55.0                 | 45.0                 | n/a                 | 8.35 |       |                                 |                                |                 |                 |             |                              |                |                              |                              |     |
|     | With H <sub>2</sub> | 2.0               | 20          | 1.30                            | 0.145         | 0.068                                  | 89%                     | 0.29           | 0.14           | 83.0                 | 17.0                 | n/a                 | 8.34 | 0.07  | 10.32                           | 1.00                           | 0.42            | 6.32            | 2.05        | 1.08                         | 1.25           | 9.5                          | 19.5                         |     |

**Table S3 Performance data for CO<sub>2</sub> biomethanisation of food wastes** (for notes on Tables see Table S4)

| Ref                    | Substrate                         | Temp<br>oC | Reactor          | Total vol<br>L | Working vol<br>L | Mixing        | Gas recirc | Injector             | Exp'tl design | Varied                                                      | Note                                                                                                                                                                                                                                                   |
|------------------------|-----------------------------------|------------|------------------|----------------|------------------|---------------|------------|----------------------|---------------|-------------------------------------------------------------|--------------------------------------------------------------------------------------------------------------------------------------------------------------------------------------------------------------------------------------------------------|
| <b>Food wastes</b>     |                                   |            |                  |                |                  |               |            |                      |               |                                                             |                                                                                                                                                                                                                                                        |
| Tao et al., 2020       | 12 Commercial and industrial FW   | 37         | CSTR             | 3              | 2                | Impeller      | Yes        | Bubble               | Sequential    | H <sub>2</sub> , exogenous CO <sub>2</sub> + H <sub>2</sub> | Additional data provided by authors                                                                                                                                                                                                                    |
| Zhang (pers com 2022)  | 53 Source separated domestic FW   | 37         | CSTR             | 5              | 4                | Mechanical    | Yes        | Bubble               | Parallel      | with/without H <sub>2</sub>                                 | Pers. com.<br>-                                                                                                                                                                                                                                        |
| Kim et al., 2021       | 54 FW                             | 37         | CSTR             | 3.7            | 3                | Mechanical    | No         | Sparger              | Sequential    | H <sub>2</sub> and pressure                                 | 1 bar<br>5 bar<br>5 bar                                                                                                                                                                                                                                |
| Yang et al., 2020      | 55 FW                             | 37         | CSTR             | 5              | 4                | Mechanical    | No         | Aeration basket      | Sequential    | Syngas injection rate                                       | Meso<br>-                                                                                                                                                                                                                                              |
|                        |                                   | 55         |                  |                |                  |               |            |                      |               |                                                             | Thermo<br>-                                                                                                                                                                                                                                            |
| Thapa et al., 2021     | 57 Thermally-treated FW digestate | 37         | Trickling filter | n/r            | 1.1              | Liquid recirc | Yes        | Headspace            | Sequential    | H <sub>2</sub> and recirc rate                              | -<br>Lowest H <sub>2</sub> %<br>Highest SMP                                                                                                                                                                                                            |
| Treu et al., 2019      | 61 Whey                           | 37         | CSTR             | n/r            | 1.5              | Magnetic      | Yes        | Ceramic              | Sequential    | Temperature + feedstock                                     | with buffer<br>-                                                                                                                                                                                                                                       |
| Fontana et al., 2018a  | 62 cheese whey permeate + powder  | 55         | CSTR             | n/r            | 3                | Magnetic      | Yes        | Ceramic membrane     | Sequential    | H <sub>2</sub> addition                                     | -<br>-                                                                                                                                                                                                                                                 |
| Lovato et al., 2017    | 63 Whey + CM                      | 55         | CSTR             | 1.8            | 1.2              | tbc           | tbc        | tbc                  | Sequential    | with/without H <sub>2</sub>                                 | -<br>-                                                                                                                                                                                                                                                 |
| Treu et al., 2019      | 61 Whey + CM                      | 54         | CSTR             | n/r            | 1.5              | Magnetic      | Yes        | Ceramic              | Sequential    | Temperature + feedstock                                     | -<br>-                                                                                                                                                                                                                                                 |
| Bassani et al., 2016   | 65 Potato-starch wastewater       | 55         | UASB             | n/r            | 1.4              | Liquid recirc | No         | Separate chamber     | Parallel      | Liquid recirc + injection                                   | Rashig<br>-<br>Ceramic with gas recirc<br>-                                                                                                                                                                                                            |
| Deschamps et al., 2021 | 66 Ethanol distillery wastewater  | 37         | AnMBR            | ?              | 148 calc         | Liquid recirc | No         | Tubular ceramic      | Sequential    | H <sub>2</sub> addition                                     | Control period<br>-                                                                                                                                                                                                                                    |
| Tao et al., 2019       | 67 Synthetic organic feed         | 37         | CSTR             | 1              | 0.5              | Impeller      | Yes        | Bubble               | Parallel      | OLR and additional CO <sub>2</sub>                          | Average of duplicates<br>Average of duplicates |
| Tao et al., 2020       | 12 Synthetic organic feed         | 37         | CSTR             | 1              | 0.5              | Impeller      | Yes        | Bubble               | Parallel      | TAN concentration                                           | TAN 2 g N/L<br>TAN 2 g N/L<br>TAN 3 g N/L<br>TAN 3 g N/L                                                                                                                                                                                               |
| Wahid et al., 2019     | 68 Glucose                        | 37         | CSTR             | 0.5            | 0.39             | Shaker        | No         | Headspace            | Parallel      | H <sub>2</sub> addition                                     | -<br>-                                                                                                                                                                                                                                                 |
| Jing et al., 2017      | 70 Glucose                        | 37         | UASB             | 1.2            | 1                | Upflow        | Yes        | Microporous diffuser | Parallel      | CO flow rate and recirculation                              | CO not H <sub>2</sub><br>CO not H <sub>2</sub>                                                                                                                                                                                                         |



**Table S3 ctd Performance data for CO<sub>2</sub> biomethanisation of food wastes (for notes on Tables see Table S4)**

| Ref Case                                   | OLR<br>g VS/L-day | HRT<br>days | H <sub>2</sub> input<br>L/L-day | SMP<br>L/g VS | SMP <sub>H<sub>2</sub></sub><br>L/g VS | SMP <sub>inc</sub><br>% | VMP<br>L/L-day | MER<br>L/L-day | CH <sub>4</sub><br>% | CO <sub>2</sub><br>% | H <sub>2</sub><br>% | pH   | CRR  | H <sub>2</sub> /CO <sub>2</sub> | H <sub>2</sub> trans/<br>input | MER/<br>Exp MER | CRR/<br>Exp CRR | MER/<br>CRR | MER/<br>VCO <sub>2</sub> org | VBP/<br>VBPorg | H <sub>2</sub> trans/<br>MER | H <sub>2</sub> trans/<br>CRR |
|--------------------------------------------|-------------------|-------------|---------------------------------|---------------|----------------------------------------|-------------------------|----------------|----------------|----------------------|----------------------|---------------------|------|------|---------------------------------|--------------------------------|-----------------|-----------------|-------------|------------------------------|----------------|------------------------------|------------------------------|
| 12 No H <sub>2</sub>                       | 4.14              | 25          |                                 | 0.561         |                                        |                         | 2.32           |                | 65.5                 | 34.2                 | 0.0                 | 8.11 |      |                                 |                                |                 |                 |             |                              |                |                              |                              |
| With H <sub>2</sub>                        | 4.14              | 25          | 3.70                            | 0.776         | 0.215                                  | 38%                     | 3.21           | 0.89           | 90.4                 | 9.1                  | 0.0                 | 8.52 | 0.89 | 3.05                            | 1.00                           | 0.96            | 0.96            | 1.04        | 0.74                         | 1.00           | 4.0                          | 4.2                          |
| With H <sub>2</sub> and CO <sub>2</sub>    | 4.14              | 25          | 10.90                           | 1.215         | 0.654                                  | 84%                     | 5.03           | 2.71           | 89.3                 | 9.9                  | 0.0                 | 8.51 | 2.66 | 4.26                            | 1.00                           | 0.99            | 0.97            | 1.03        | 0.52                         | 1.58           | 4.0                          | 4.1                          |
| 53 No H <sub>2</sub>                       | 3                 | 81          |                                 | 0.446         |                                        |                         | 1.32           |                | 61.8                 | 36.3                 |                     | 8.07 |      |                                 |                                |                 |                 |             |                              |                |                              |                              |
| With H <sub>2</sub>                        | 3                 | 81          | 2.42                            | 0.719         | 0.272                                  | 61%                     | 1.94           | 0.62           | 74.4                 | 17.9                 | 9.6                 | 8.14 | 0.31 | 3.12                            | 0.90                           | 1.15            | 0.57            | 2.03        | 1.16                         | 1.06           | 3.5                          | 7.1                          |
| 54 No H <sub>2</sub>                       | 2.67              | 75          |                                 | 0.280         |                                        |                         | 0.75           |                | 52.4                 | 47.0                 |                     | 7.50 |      |                                 |                                |                 |                 |             |                              |                |                              |                              |
| No H <sub>2</sub>                          | 2.67              | 75          |                                 | 0.260         |                                        |                         | 0.68           |                | 74.0                 | 25.5                 |                     | 7.20 |      |                                 |                                |                 |                 |             |                              |                |                              |                              |
| With H <sub>2</sub>                        | 2.67              | 75          | 0.54                            | 0.280         | 0.020                                  | 8%                      | 0.85           | 0.17           | 90.6                 | 7.5                  | 0.8                 | 7.80 | 0.16 | 2.35                            | 0.99                           | 1.28            | 1.19            | 1.07        | 0.74                         | 0.99           | 3.1                          | 3.3                          |
| 55 No syngas                               | 3.5               | 20          |                                 | 0.321         |                                        |                         | 1.13           |                | 62.2                 | 37.8                 |                     | 7.12 |      |                                 |                                |                 |                 |             |                              |                |                              |                              |
| With syngas                                | 3.5               | 20          | 1.33                            | 0.422         | 0.101                                  | 31%                     | 1.49           | 0.36           | 61.1                 | 37.0                 | 2.0                 | 7.19 | 0.21 | n/a                             | 0.96                           | 1.12            | 0.67            | 1.67        | 0.52                         | 1.31           | n/a                          | n/a                          |
| No syngas                                  | 3.5               | 20          |                                 | 0.384         |                                        |                         | 1.35           |                | 63.5                 | 36.5                 |                     | 7.22 |      |                                 |                                |                 |                 |             |                              |                |                              |                              |
| With syngas                                | 3.5               | 20          | 1.33                            | 0.509         | 0.125                                  | 33%                     | 1.79           | 0.44           | 64.0                 | 35.8                 | 0.2                 | 7.22 | 0.31 | n/a                             | 1.00                           | 1.34            | 0.95            | 1.41        | 0.57                         | 1.31           | n/a                          | n/a                          |
| 57 No H <sub>2</sub>                       | 1.88              | 10          |                                 | 0.239         |                                        |                         | 0.45           |                | 48.7                 | 51.4                 | 0.0                 | 7.82 |      |                                 |                                |                 |                 |             |                              |                |                              |                              |
| With H <sub>2</sub>                        | 1.88              | 10          | 1.40                            | 0.415         | 0.176                                  | 73%                     | 0.78           | 0.33           | 71.4                 | 22.8                 | 5.8                 | 7.98 | 0.26 | 2.75                            | 0.96                           | 0.99            | 0.78            | 1.27        | 0.65                         | 1.14           | 4.1                          | 5.2                          |
| With H <sub>2</sub>                        | 1.88              | 10          | 1.50                            | 0.452         | 0.213                                  | 89%                     | 0.85           | 0.40           | 68.2                 | 16.7                 | 15.1                | 8.02 | 0.31 | 2.94                            | 0.87                           | 1.22            | 0.95            | 1.29        | 0.78                         | 1.29           | 3.3                          | 4.2                          |
| 61 No H <sub>2</sub>                       | 2.2               | 25          |                                 | 0.288         |                                        |                         | 0.63           |                | 58.6                 | 41.4                 |                     | 6.88 |      |                                 |                                |                 |                 |             |                              |                |                              |                              |
| With H <sub>2</sub>                        | 2.2               | 25          | 0.90                            | 0.434         | 0.146                                  | 51%                     | 0.96           | 0.32           | 56.5                 | 25.0                 | 18.6                | 7.59 | 0.03 | 2.00                            | 0.65                           | 2.20            | 0.18            | 12.28       | 0.76                         | 1.27           | 1.8                          | 22.3                         |
| 62 No H <sub>2</sub>                       | 2.4               | 15          |                                 | 0.110         |                                        |                         | 0.26           |                | 44.6                 | 55.4                 |                     | n/r  |      |                                 |                                |                 |                 |             |                              |                |                              |                              |
| With H <sub>2</sub>                        | 2.4               | 15          | 0.82                            | 0.142         | 0.032                                  | 29%                     | 0.34           | 0.08           | 51.6                 | 23.0                 | 25.4                | n/r  | 0.18 | 2.49                            | 0.79                           | 0.39            | 0.89            | 0.44        | 0.23                         | 0.83           | 8.4                          | 3.7                          |
| 63 No H <sub>2</sub>                       | 3.71              | 15          |                                 | 0.244         |                                        |                         | 0.90           |                | 65.6                 | 34.4                 |                     | 7.74 |      |                                 |                                |                 |                 |             |                              |                |                              |                              |
| With H <sub>2</sub>                        | 3.71              | 15          | 0.80                            | 0.283         | 0.039                                  | 16%                     | 1.05           | 0.14           | 72.7                 | 22.2                 | 5.1                 | 7.92 | 0.15 | 1.69                            | 0.91                           | 0.80            | 0.85            | 0.94        | 0.31                         | 0.99           | 5.0                          | 4.7                          |
| 61 No H <sub>2</sub>                       | 2.2               | 15          |                                 | 0.412         |                                        |                         | 0.91           |                | 68.2                 | 31.8                 |                     | 7.76 |      |                                 |                                |                 |                 |             |                              |                |                              |                              |
| With H <sub>2</sub>                        | 2.2               | 15          | 0.84                            | 0.444         | 0.032                                  | 8%                      | 0.98           | 0.07           | 73.2                 | 21.6                 | 5.1                 | 8.03 | 0.13 | 2.00                            | 0.92                           | 0.36            | 0.69            | 0.53        | 0.25                         | 0.95           | 11.0                         | 5.8                          |
| 65 No H <sub>2</sub>                       | 3.73              | 5           |                                 | 0.329         |                                        |                         | 1.23           |                | 60.9                 | 39.1                 |                     | 7.60 |      |                                 |                                |                 |                 |             |                              |                |                              |                              |
| With H <sub>2</sub>                        | 3.73              | 5           | 2.64                            | 0.401         | 0.072                                  | 18%                     | 1.50           | 0.27           | 44.9                 | 18.5                 | 36.6                | 7.90 | 0.17 | 3.35                            | 0.54                           | 0.76            | 0.48            | 1.58        | 0.34                         | 1.05           | 5.2                          | 8.3                          |
| No H <sub>2</sub>                          | 3.73              | 5           |                                 | 0.311         |                                        |                         | 1.16           |                | 61.1                 | 38.9                 |                     | 7.64 |      |                                 |                                |                 |                 |             |                              |                |                              |                              |
| With H <sub>2</sub>                        | 3.73              | 5           | 2.14                            | 0.366         | 0.055                                  | 15%                     | 1.37           | 0.20           | 66.4                 | 20.5                 | 13.0                | 7.83 | 0.32 | 2.90                            | 0.87                           | 0.44            | 0.68            | 0.64        | 0.28                         | 0.94           | 9.2                          | 5.9                          |
| 66 No H <sub>2</sub>                       | 3.5               | 3.5         |                                 | 0.297         |                                        |                         | 1.04           |                | 74.7                 | 25.3                 |                     | 7.30 |      |                                 |                                |                 |                 |             |                              |                |                              |                              |
| With H <sub>2</sub>                        | 4.4               | 4.4         | 1.88                            | 0.389         | 0.092                                  | 31%                     | 1.71           | 0.40           | 97.9                 | 1.4                  | 0.7                 | 7.90 | 0.42 | 5.33                            | 0.99                           | 0.87            | 0.90            | 0.97        | 1.15                         | 1.26           | 4.6                          | 4.5                          |
| 67 OLR 2 no H <sub>2</sub>                 | 2                 | 15          |                                 | 0.289         |                                        |                         | 0.58           |                | 49.9                 | 47.3                 |                     | 7.14 |      |                                 |                                |                 |                 |             |                              |                |                              |                              |
| OLR 2 with H <sub>2</sub>                  | 2                 | 15          | 2.10                            | 0.532         | 0.244                                  | 84%                     | 1.06           | 0.52           | 92.5                 | 4.2                  | 0.3                 | 7.87 | 0.50 | 3.84                            | 1.00                           | 0.93            | 0.95            | 0.98        | 0.89                         | 0.99           | 4.0                          | 4.2                          |
| OLR 2 with H <sub>2</sub> +CO <sub>2</sub> | 2                 | 15          | 6.20                            | 0.963         | 0.674                                  | 234%                    | 1.93           | 1.55           | 89.1                 | 4.4                  | 0.0                 | 7.84 | 1.55 | 3.76                            | 1.00                           | 0.87            | 1.00            | 0.87        | 0.82                         | 1.80           | 4.6                          | 4.0                          |
| OLR 3 no H <sub>2</sub>                    | 3                 | 15          |                                 | 0.288         |                                        |                         | 0.86           |                | 50.1                 | 47.3                 |                     | 7.35 |      |                                 |                                |                 |                 |             |                              |                |                              |                              |
| OLR 3 with H <sub>2</sub>                  | 3                 | 15          | 2.90                            | 0.493         | 0.205                                  | 71%                     | 1.48           | 0.72           | 92.3                 | 4.3                  | 1.0                 | 7.96 | 0.75 | 3.55                            | 0.99                           | 0.85            | 1.04            | 0.82        | 0.75                         | 0.92           | 4.0                          | 3.9                          |
| OLR 3 with H <sub>2</sub> +CO <sub>2</sub> | 3                 | 15          | 9.12                            | 0.918         | 0.630                                  | 219%                    | 2.75           | 2.28           | 88.0                 | 4.9                  | 0.0                 | 7.75 | 2.30 | 3.71                            | 1.00                           | 0.83            | 1.01            | 0.82        | 0.77                         | 1.73           | 4.8                          | 4.0                          |
| OLR 4 no H <sub>2</sub>                    | 4                 | 15          |                                 | 0.290         |                                        |                         | 1.16           |                | 49.9                 | 47.7                 |                     | 7.39 |      |                                 |                                |                 |                 |             |                              |                |                              |                              |
| OLR 4 with H <sub>2</sub>                  | 4                 | 15          | 4.43                            | 0.562         | 0.272                                  | 94%                     | 2.25           | 1.11           | 91.4                 | 5.5                  | 0.0                 | 8.16 | 0.97 | 3.99                            | 1.00                           | 0.98            | 0.88            | 1.11        | 0.98                         | 1.05           | 4.0                          | 4.5                          |
| OLR 5 no H <sub>2</sub>                    | 5                 | 15          |                                 | 0.278         |                                        |                         | 1.39           |                | 48.6                 | 48.9                 |                     | 7.38 |      |                                 |                                |                 |                 |             |                              |                |                              |                              |
| OLR 5 with H <sub>2</sub>                  | 5                 | 15          | 4.20                            | 0.451         | 0.174                                  | 63%                     | 2.26           | 0.97           | 72.0                 | 15.3                 | 10.7                | 7.77 | 0.92 | 3.01                            | 0.92                           | 0.90            | 0.95            | 0.95        | 0.62                         | 0.98           | 4.0                          | 4.2                          |
| 12 No H <sub>2</sub>                       | 3                 | 15          |                                 | 0.295         |                                        |                         | 0.89           |                | 54.3                 | 45.3                 | 0.0                 | 7.67 |      |                                 |                                |                 |                 |             |                              |                |                              |                              |
| with H <sub>2</sub>                        | 3                 | 15          | 2.40                            | 0.462         | 0.166                                  | 56%                     | 1.39           | 0.50           | 88.6                 | 10.7                 | 0.0                 | 8.23 | 0.57 | 3.25                            | 1.00                           | 0.83            | 0.95            | 0.88        | 0.68                         | 0.96           | 4.8                          | 4.2                          |
| No H <sub>2</sub>                          | 3                 | 15          |                                 | 0.242         |                                        |                         | 0.73           |                | 54.5                 | 45.1                 | 0.0                 | 7.81 |      |                                 |                                |                 |                 |             |                              |                |                              |                              |
| with H <sub>2</sub>                        | 3                 | 15          | 1.60                            | 0.374         | 0.131                                  | 54%                     | 1.12           | 0.39           | 80.5                 | 18.6                 | 0.0                 | 8.17 | 0.34 | 2.66                            | 1.00                           | 0.98            | 0.86            | 1.15        | 0.65                         | 1.04           | 4.1                          | 4.7                          |
| 68 No H <sub>2</sub>                       | 0.07              | 21          |                                 | 0.35          |                                        |                         | 0.00           |                | 66.7                 | 33.3                 |                     | 7.07 |      |                                 |                                |                 |                 |             |                              |                |                              |                              |
| With H <sub>2</sub>                        |                   |             | 0.06                            | 0.57          | 0.222                                  | 63%                     | 0.04           | 0.02           | 94.5                 | 3.1                  | 2.5                 | 7.64 | 0.01 | 4.61                            | 0.98                           | 1.12            | 0.79            | 1.42        | 1.26                         | 1.13           | 3.6                          | 5.1                          |
| 70 No CO                                   | 5                 | 3           |                                 | 0.312         |                                        |                         | 1.56           |                | 74.2                 | 24.5                 |                     | 7.67 |      |                                 |                                |                 |                 |             |                              |                |                              |                              |
| With CO                                    | 5                 | 3           | n/a                             | 0.536         | 0.225                                  | 72%                     | 2.68           | 1.12           | 36.7                 | 55.3                 | 5.1                 | 7.28 | n/a  | n/a                             | 0.93                           | 0.97            | n/a             | n/a         | 2.18                         | 3.24           | n/a                          | n/a                          |

**Table S4 Performance data for CO<sub>2</sub> biomethanisation of sewage sludges**

|                         | Ref | Substrate | Temp<br>oC | Reactor | Total vol<br>L | Working vol<br>L | Mixing                | Gas recirc | Injector | Exp'tl design | Varied                                                   | Note                                                                                                                          |
|-------------------------|-----|-----------|------------|---------|----------------|------------------|-----------------------|------------|----------|---------------|----------------------------------------------------------|-------------------------------------------------------------------------------------------------------------------------------|
| <b>Sewage sludge</b>    |     |           |            |         |                |                  |                       |            |          |               |                                                          |                                                                                                                               |
| Alfaro et al., 2019     | 74  | Mixed SS  | 35         | CSTR    | 27.8           | 20               | Pump                  | Yes        | HFM      | Parallel      | gas recirculation rate                                   | Low gas recirc<br>-<br>Intermediate gas recirc<br>-<br>High gas recirc<br>-                                                   |
| Tao et al., 2020        | 12  | Mixed SS  | 37         | CSTR    | 3              | 2                | Mechanical            | Yes        | Bubble   | Sequential    | with/without H <sub>2</sub>                              | Additional data<br>provided by authors                                                                                        |
| Zhang (pers com 2022)   | 53  | Mixed SS  | 37         | CSTR    | 3              | 2                | Mechanical            | Yes        | Bubble   | Sequential    | with H <sub>2</sub> and H <sub>2</sub> + CO <sub>2</sub> | Pers. com.<br>-<br>-                                                                                                          |
| Corbellini et al., 2019 | 75  | Mixed SS  | 35         | CSTR    | 2.4            | 1                | Magnetic              | No         | Syringe  | Parallel      | H <sub>2</sub> addition                                  | -<br>-<br>-                                                                                                                   |
| Corbellini et al., 2021 | 76  | Mixed SS  | 36.7       | CSTR    | 16             | 11               | Mechanical            | No         | Tube     | Sequential    | H <sub>2</sub> addition                                  | Control period<br>H <sub>2</sub> /CO <sub>2</sub> 4<br>H <sub>2</sub> /CO <sub>2</sub> 6<br>H <sub>2</sub> /CO <sub>2</sub> 7 |
| Diaz et al., 2020       | 77  | Mixed SS  | 35         | CSTR    | 48             | 35               | Recirc + static mixer | No         | n/r      | Sequential    | Pressure and H <sub>2</sub> addition                     | 200 kPa<br>300 kPa                                                                                                            |
| Luo et al., 2013c       | 78  | Mixed SS  | 55         | CSTR    | 0.6            | 0.4              | Magnetic              | No         | HFM      | Parallel      | CO addition                                              | Control reactor<br>Highest SMP without residual CO<br>Control reactor<br>Highest SMP                                          |
| Wang et al., 2013       | 79  | Mixed SS  | 37         | CSTR    | 3              | 2                | Mechanical            | No         | HFM      | Sequential    | with/without SCOG and pH control                         | Control period<br>No pH control<br>pH controlled to <8                                                                        |

**Table S4 ctd Performance data for CO<sub>2</sub> biomethanisation of sewage sludges**

| Ref | Case                                  | OLR<br>g VS/L-day | HRT<br>days | H <sub>2</sub> input<br>L/L-day | SMP<br>L/g VS | SMP <sub>H<sub>2</sub></sub><br>L/g VS | SMP <sub>inc</sub><br>% | VMP<br>L/L-day | MER<br>L/L-day | CH <sub>4</sub><br>% | CO <sub>2</sub><br>% | H <sub>2</sub><br>% | pH   | CRR  | H <sub>2</sub> /CO <sub>2</sub> | H <sub>2</sub> trans/<br>input | MER/<br>Exp MER | CRR/<br>Exp CRR | MER/<br>CRR | MER/<br>VCO <sub>2</sub> org | VBP/<br>VBPorg | H <sub>2</sub> trans/<br>MER | H <sub>2</sub> trans/<br>CRR |
|-----|---------------------------------------|-------------------|-------------|---------------------------------|---------------|----------------------------------------|-------------------------|----------------|----------------|----------------------|----------------------|---------------------|------|------|---------------------------------|--------------------------------|-----------------|-----------------|-------------|------------------------------|----------------|------------------------------|------------------------------|
| 74  | No H <sub>2</sub>                     | 1.3               | 20          |                                 | 0.338         |                                        |                         | 0.44           |                | 65.8                 | 34.1                 | 0.0                 | 7.41 |      |                                 |                                |                 |                 |             |                              |                |                              |                              |
|     | With H <sub>2</sub>                   |                   | 20          | 0.87                            | 0.415         | 0.077                                  | 23%                     | 0.54           | 0.10           | 51.1                 | 12.4                 | 36.5                | 7.28 | 0.10 | 3.95                            | 56%                            | 0.72            | 0.72            | 1.00        | 0.44                         | 1.00           | 4.8                          | 4.8                          |
|     | No H <sub>2</sub>                     | 1.5               | 20          |                                 | 0.213         |                                        |                         | 0.32           |                | 68.0                 | 32.0                 | 0.0                 | 7.42 |      |                                 |                                |                 |                 |             |                              |                |                              |                              |
|     | With H <sub>2</sub>                   |                   | 20          | 0.87                            | 0.313         | 0.100                                  | 47%                     | 0.47           | 0.15           | 70.9                 | 11.4                 | 17.7                | 7.80 | 0.07 | 3.95                            | 86%                            | 0.69            | 0.32            | 2.14        | 1.00                         | 1.17           | 5.0                          | 10.7                         |
|     | No H <sub>2</sub>                     | 1.8               | 20          |                                 | 0.211         |                                        |                         | 0.38           |                | 67.1                 | 32.9                 | 0.0                 | 7.41 |      |                                 |                                |                 |                 |             |                              |                |                              |                              |
|     | With H <sub>2</sub>                   |                   | 20          | 0.87                            | 0.300         | 0.089                                  | 42%                     | 0.54           | 0.16           | 73.1                 | 19.7                 | 7.2                 | 8.09 | 0.03 | 3.95                            | 94%                            | 0.68            | 0.13            | 5.33        | 0.87                         | 1.23           | 5.1                          | 27.2                         |
| 12  | No H <sub>2</sub>                     | 3.64              | 15          |                                 | 0.309         |                                        |                         | 1.12           |                | 60.1                 | 39.4                 | 0.0                 | 7.32 |      |                                 |                                |                 |                 |             |                              |                |                              |                              |
|     | With H <sub>2</sub>                   | 3.64              | 15          | 2.70                            | 0.437         | 0.129                                  | 42%                     | 1.59           | 0.47           | 90.5                 | 8.2                  | 0.0                 | 7.94 | 0.59 | 3.67                            | 100%                           | 0.69            | 0.88            | 0.79        | 0.64                         | 0.94           | 5.8                          | 4.6                          |
| 53  | No H <sub>2</sub>                     | 3                 | 20.4        |                                 | 0.214         |                                        |                         | 0.63           |                | 65.4                 | 36.1                 |                     | 7.56 |      |                                 |                                |                 |                 |             |                              |                |                              |                              |
|     | With H <sub>2</sub>                   | 3                 | 25.6        | 1.12                            | 0.351         | 0.138                                  | 64%                     | 1.05           | 0.43           | 85.0                 | 15.3                 | 0.0                 | 7.96 | 0.16 | 3.24                            | 100%                           | 1.53            | 0.56            | 2.75        | 1.24                         | 1.28           | 2.6                          | 7.2                          |
|     | with H <sub>2</sub> + CO <sub>2</sub> | 3                 | 25.9        | 7.65                            | 1.001         | 0.787                                  | 224%                    | 3.00           | 2.38           | 65.0                 | 16.9                 | 17.1                | 7.76 | 1.61 | 22.14                           | 94%                            | 1.33            | 0.90            | 1.48        | 0.99                         | 3.91           | 3.0                          | 4.4                          |
| 75  | No H <sub>2</sub>                     | 1                 | 15          |                                 | 0.162         |                                        |                         | 0.167          |                | 71.3                 | 28.6                 |                     | 7.00 |      |                                 |                                |                 |                 |             |                              |                |                              |                              |
|     | With H <sub>2</sub>                   | 1                 | 15          | 0.13                            | 0.194         | 0.032                                  | 20%                     | 0.195          | 0.03           | 77.2                 | 22.8                 | 0.0                 | 7.30 | 0.01 | 1.99                            | 100%                           | 0.86            | 0.28            | 3.08        | 12.80                        | 1.08           | 4.7                          | 14.4                         |
|     | With H <sub>2</sub>                   | 1                 | 15          | 0.12                            | 0.194         | 0.032                                  | 20%                     | 0.195          | 0.03           | 77.0                 | 22.3                 | 0.0                 | 7.20 | 0.01 | 1.85                            | 100%                           | 0.90            | 0.34            | 2.66        | 13.48                        | 1.08           | 4.4                          | 11.8                         |
| 76  | No H <sub>2</sub>                     | 1.3               | 22          |                                 | 0.194         |                                        |                         | 0.252          |                | 75.6                 | 24.4                 |                     | 7.4  |      |                                 |                                |                 |                 |             |                              |                |                              |                              |
|     | With H <sub>2</sub>                   | 1.4               | 22          | 0.37                            | 0.224         | 0.043                                  | 23%                     | 0.314          | 0.08           | 81.0                 | 14.2                 | 4.8                 | 7.4  | 2%   | 5.10                            | 95%                            | 0.90            | 0.19            | 4.68        | 1.09                         | 1.20           | 4.4                          | 20.8                         |
|     | With H <sub>2</sub>                   | 1.5               | 22          | 0.33                            | 0.218         | 0.036                                  | 20%                     | 0.327          | 0.09           | 83.5                 | 13.4                 | 3.1                 | 7.4  | 2%   | 4.61                            | 96%                            | 1.14            | 0.24            | 4.69        | 1.27                         | 1.23           | 3.5                          | 16.4                         |
|     | With H <sub>2</sub>                   | 1.5               | 22          | 0.37                            | 0.203         | 0.022                                  | 12%                     | 0.305          | 0.07           | 86.3                 | 7.6                  | 6.0                 | 7.4  | 4%   | 5.11                            | 94%                            | 0.80            | 0.52            | 1.54        | 0.96                         | 1.08           | 5.0                          | 7.7                          |
| 77  | With H <sub>2</sub>                   | 0.92              | 20          | 0.45                            | 0.332         | 0.000                                  | 0%                      | 0.31           | 0.00           | 69.4                 | 15.2                 | 15.4                | 6.60 |      | n/a                             | 85%                            |                 |                 |             |                              |                |                              |                              |
|     | With H <sub>2</sub>                   | 1.2               | 20          | 0.64                            | 0.418         | 0.110                                  | 30%                     | 0.50           | 0.13           | 92.9                 | 6.3                  | 0.8                 | 7.00 | n/r  | n/a                             | 99%                            | 0.83            | n/r             | n/r         | n/a                          | n/a            | 4.8                          | n/r                          |
| 78  | No CO                                 | 3.35              | 10          |                                 | 0.201         |                                        |                         | 0.67           |                | 62.1                 | 36.6                 |                     | 7.24 |      |                                 |                                |                 |                 |             |                              |                |                              |                              |
|     | With CO                               |                   | 10          | n/a                             | 0.541         | 0.339                                  | 169%                    | 1.81           | 1.14           | 29.8                 | 68.9                 | 0.0                 | 7.03 | n/a  | n/a                             | n/a                            | n/a             | n/a             | n/a         | n/a                          | n/a            | n/a                          | n/a                          |
|     | No CO                                 | 3.35              | 10          | n/a                             | 0.187         |                                        |                         | 0.63           |                | 61.0                 | 38.3                 |                     | 7.29 |      |                                 |                                |                 |                 |             |                              |                |                              |                              |
|     | With CO                               |                   | 10          | n/a                             | 0.595         | 0.407                                  | 217%                    | 1.99           | 1.36           | 19.2                 | 44.5                 | 35.2                | 7.17 | n/a  | n/a                             | n/a                            | n/a             | n/a             | n/a         | n/a                          | n/a            | n/a                          | n/a                          |
| 79  | No SCOG                               | 1.08              | 10          |                                 | 0.256         |                                        |                         | 0.28           |                | 64.4                 | 34.2                 | 1.4                 | 7.00 |      |                                 |                                |                 |                 |             |                              |                |                              |                              |
|     | With SCOG                             |                   | 10          | 0.65                            | 0.404         | 0.148                                  | 58%                     | 0.44           | 0.16           | 89.9                 | 9.1                  | 1.0                 | 7.50 | 0.15 | 0.10                            | 100%                           | 1.02            | 0.70            | 1.55        | 1.08                         | 1.13           | n/a                          | n/a                          |
|     | With SCOG                             |                   | 10          | 1.44                            | 0.604         | 0.200                                  | 78%                     | 0.65           | 0.22           | 98.8                 | 0.3                  | 0.9                 | 8.00 | 0.35 | 0.15                            | 100%                           | 0.96            | 0.40            | 2.59        | 2.55                         | 1.54           | n/a                          | n/a                          |

Notes for Tables S1-S4:

|       |                                 |      |                                         |
|-------|---------------------------------|------|-----------------------------------------|
| AnMBR | Anaerobic membrane bioreactor   | n/r  | Not reported                            |
| CM    | Cattle manure or slurry         | PM   | Pig manure                              |
| CSTR  | Continuous stirred tank reactor | SCOG | Simulated coke-oven gas                 |
| FW    | Food waste                      | SS   | Sewage sludge                           |
| HFM   | Hollow Fibre Membrane           | UASB | Upflow anaerobic sludge blanket reactor |

## **S2. Sources of Anaerobic Digestion Feedstock and Generation Data**

Note that some sources in the main text and in link below may refer to data for a particular year. These are generally part of a regular (i.e. monthly, quarterly, yearly) series of data for which an internet search can provide the most recent details.

Other energy-based initiatives exist (for example, Contracts for Difference (CfD) and Smart Export Guarantee (SEG)) but, although anaerobic digestion (AD) could technically access these, in practice AD operators have not taken up the option.

### **S2.1 GENERATION DATA**

#### **S2.1.1. Generation Data from UK Government Sources**

a. **Renewables Obligation (RO).** The RO was a 20-year index-linked incentive available between 2002-2017 to AD operators who wished to generate electricity for use on site or feeding into the national grid by using biogas in a combined heat and power plant (CHP). Data on generation is available from the Ofgem portal:

<https://renewablesandchp.ofgem.gov.uk/Public/ReportManager.aspx?ReportVisibility=1&ReportCategory=0>

A list of accredited generating stations can be derived under the RO, filtering by technology group AD, although this excludes AD stations from technology group '50kW DNC or less'.

Because Renewables Obligation Certificates (ROCs) show generation for all stations under a technology group, a better approach is to use ROCs. 'Fuelled' is the technology group and 'AD' the generation type. There was no FIT in Northern Ireland, so those (usually smaller) plants which might have accessed the Feed-In Tariff (FIT) instead operated under the RO.

At an individual technology level, RO generation capacity can sometimes be overstated, possibly because the site has an overall installed capacity derived from several technologies. This is particularly the case with a few very large plants which use AD combined with other technologies. The installed capacity (or even the average installed capacity for all generators) therefore cannot be reliably used to calculate load factors.

ROCs have a unique ROCs accreditation number. Other useful data includes the number of certificates and MWh per certificate because some sites get different ROCs, e.g. Factors of .5555, .25, .333, .5, .52 and 1. Both fields are needed to calculate generation associated with the ROC. Certificate status is necessary, as revoked ones could indicate an error, but Issued, Redeemed and Retired ones can be used. Issue date is important in order to determine if station is still generating, at least under this scheme. ROC data can change because although the 'year' runs from April to March, the data is subject to change up to the following 1<sup>st</sup> of November which is the legislative deadline for the calculation and distribution of the buyout.

b. **Feed-In Tariff (FIT)** –The FIT was a 20-year index linked incentive available to small-scale (<5 MWe) AD operators who wished to generate electricity through a CHP.

Ofgem data for FIT AD generators is available from:

<https://www.ofgem.gov.uk/publications/feed-tariff-installation-report-31-march-2021>

From three large spreadsheets, the Non-Domestic AD tariff can be extracted. There is no unique identifying code in the public data: coding is likely to be based on the Meter Point Administration

Number (MPAN), of which only first two characters are shown to the public. The most useful information is the generator's Total Installed Capacity (TIC). Further data includes the first half of a post code and location data, including Government Office Region, Local Authority and Lower/Middle Layer Super Output Area which are typically census data region codes.

Ofgem Load Factors (LF) can be applied to the TIC in order to estimate the generation of a particular site. These LF are updated yearly and, for the year 20-21 have a weighted mean of 61.4%, whereas the year before were 75.3% for AD. LF's are different from the DUKES data which calculates a load factor for sewage sludge digestion of 49.6% and AD of 61.7%

It is possible to find actual generation data for some of the generators, but not all of them. The link in the REF data explains this approach. Unlike solar, load factors for AD sites can vary considerably from each other.

The FIT annual report and accompanying dataset report the number of installations and TIC >50kW and < 50kW. (<https://www.ofgem.gov.uk/publications/feed-tariff-fit-annual-report-2020-21>)

Monthly central feed-in tariff register statistics provide a list, broken down by month of the number of accredited plants and TIC: <https://www.gov.uk/government/statistical-data-sets/monthly-central-feed-in-tariff-register-statistics>

c. **Renewable Heat Incentive (RHI).** The RHI (2011-21) was a 20-year index-linked incentive designed to encourage biogas combustion for heat, as well as for biomethane production, usually going to the gas grid.

The reports and data here: <https://www.ofgem.gov.uk/environmental-and-social-schemes/non-domestic-renewable-heat-incentive-rhi/contacts-guidance-and-resources/public-reports-and-data-ndrhi>. Monthly data are produced (where the March monthly data acts as annual data – tables beginning with S). Heat is divided into biogas and biomethane. A 'small number' of unspecified generators are included in the biogas figures are not using AD, so these figures should be treated with caution.

Table 1.5 does, however, show cumulative generation from Nov 11 to Dec xx, so it is possible to extract biomethane generation by subtracting successive reports over the time frame required. Tables which show generation by region include redacted figures if there are only a small number of generators, so only a total number of accredited stations can be derived.

Capacity is not quoted for biomethane plants because plants do not fall within the official definition of capacity. Table 1.5 uses an unspecified CV to quote a GWh generation figure.

RO and FIT generation was compared with DUKES electricity generation and differences were minor, likely due to factors such as rounding and timing differences. DUKES generation for biomethane injection was 64% greater than the RHI generation which could potentially be due to the inclusion of Renewable Transport Fuel Certificates which would not be included in RHI data, as well as other timing and rounding factors.

d. **Renewable Transport Fuel Obligation (RTFO).** The RTFO is a market-based incentive which requires obligated suppliers of fuel to have a proportion of renewable fuel in the mix, evidenced by Renewable Transport Fuel Certificates (RTFCs). It came into force in 2008 but for many years had relatively little take-up by AD operators because funding for an AD plant could not be raised on the potential income at the existing - and fluctuating - market price, which also had no floor (i.e.

minimum) value. However, later flexibility within policy, coupled with growing numbers of biomethane vehicles and refuelling infrastructure has meant strong growth in this sector in recent years. The latest Green Gas Support Scheme is flexible enough to allow operators to choose between using gas for the purposes of biomethane injection or transport fuel. Injection into the grid occurs for both purposes – it is simply the end use which differs.

Data are available here: <https://www.gov.uk/government/statistics/renewable-fuel-statistics-2021-third-provisional-report>. The DUKES methodology states that RTFO data is included, but it is not specifically split out of the AD figures; the differences between the RHI biomethane generation figures and the DUKES biomethane figures are sufficiently large for the reasonable assumption to be made that the RTFO figures are included in the DUKES biomethane data (see DUKES data below for further discussion).

e. **Digest of UK Energy Statistics (DUKES) Data.** DUKES uses a vast array of data sources to provide a comprehensive overview of energy sources and use within the UK.

DUKES data is available here:

<https://www.gov.uk/government/statistics/digest-of-uk-energy-statistics-dukes-2021>. For the purposes of obtaining data on AD, the detailed chapter 6 information on renewables is useful: <https://www.gov.uk/government/statistics/renewable-sources-of-energy-chapter-6-digest-of-united-kingdom-energy-statistics-dukes>

Detailed data can be obtained from tables 6.4 and 6.6, as well as the methodology:

<https://www.gov.uk/government/publications/renewable-energy-statistics-data-sources-and-methodologies>.

Sources for data that are relevant to AD include

Ofgem renewables and CHP <https://renewablesandchp.ofgem.gov.uk>

FIT <https://www.gov.uk/government/statistical-data-sets/monthly-central-feed-in-tariff-register-statistics>

RHI <https://rhi.ofgem.gov.uk/Public/Login.aspx?id=1>

CHP <https://www.gov.uk/government/collections/combined-heat-and-power-statistics>

Microgeneration ROO-FIT

[https://data.gov.uk/dataset/microgeneration\\_certification\\_scheme\\_and\\_roofit\\_statistics](https://data.gov.uk/dataset/microgeneration_certification_scheme_and_roofit_statistics)

NNFCC list of operational AD sites <http://www.biogas-info.co.uk/resources/biogas-map>

WRAP list of operational AD sites <http://www.wrap.org.uk/content/operational-ad-sites>

RTFO <https://www.gov.uk/government/collections/biofuels-statistics>

Whilst the methodology gives a good general description of data sources, it is not clear exactly what data is used from each source and how it is derived.

Calorific values are in the methodology and here:

<https://www.gov.uk/government/statistics/dukes-calorific-values>. Rather incorrectly, DUKES describe biomethane to grid as 'biogas grid injection'. Additionally, the methodology uses a net calorific value (NCV) of 19-24 for 'biogas (anaerobic digestion – farm/food)' but does not specify assumptions for the NCV of biomethane.

The DUKES methodology description specifically states the following: "Biogas grid injection: Some AD is injected into the main GB gas network. In the renewables energy balance, this is considered a statistical transfer of biogas from renewables to natural gas. This is sourced from RHI data." This implies that RTFO data is not used; however, DUKES overall data sources do include RTFO data so it

is unclear where the proportion of biomethane destined for road transport is included; as stated above, it would appear to possibly be included within RHI figures.

#### S2.1.2. Generation data from non-governmental sources

In addition to the NNFCC data mentioned above, there are at least two further reliable and regularly updated sources for AD plant generation data.

a. **Anaerobic Digestion Bioresources Association (ADBA)** – A comprehensive database that is regularly updated is provided to members. Sources are not stated, but are derived from public information, e.g. planning information, Ofgem, and press releases. A subset of the data is publicly available at <https://adbioresources.org/resources/ad-plant-map>.

b. **Renewable Energy Foundation (REF)** – The Renewable Energy Foundation provides a comprehensive list of renewable generators, FIT generators and renewable electricity totals from which AD generation can be extracted. Data are available here:

<https://www.ref.org.uk/energy-data>

The data are derived from publicly available information, with sources described here:

<https://www.ref.org.uk/energy-data/notes-on-renewable-generation-data>

Notes on data derivation: With regards to electricity generation from AD, in order of precedence, the REF use RO data (ROCs), then Renewable Energy Guarantees of Origins (REGOs) and then Climate Change Levy Exemption Certificates (LECs). REGOs, for example, can be downloaded from Ofgem, but they appear to cover both ROC and FIT generation so have to be referenced back to the generation lists, although this is particularly difficult for FIT generators who are only publicly identified by the first part of the post code. A proportion of FIT generators do not seem to claim REGOS, so for these REF generation data is estimated from the Total Installed Capacity (TIC) named in the FIT Register, using the technology load factor being derived from generators for which they do have data. Further information on their methodology is available here:

<https://www.ref.org.uk/energy-data/notes-on-small-scale-green-generators>

#### S2.2 FEEDSTOCK DATA

a. **GENERAL** – Some AD plants have different sustainability reporting requirements, depending upon which incentive scheme they operate under, the size of the AD plant and, possibly, when they joined the scheme, e.g. sustainability criteria applied to new FIT (known by Ofgem as ROO-FIT) accredited after 1 May 17.

Feedstock sustainability is evidenced through the submission of a Fuel Measurement and Sampling Questionnaire (FMS). This also applies to RO stations, RHI, GGSS and RTFC's, but all differ slightly in their interpretations of wastes, products, co-products and by-products. Thereafter quarterly sustainability declarations are submitted (usually, though there are exceptions, see links below).

FIT sustainability info here:

<https://www.ofgem.gov.uk/fuelling-and-sustainability-fit-anaerobic-digestion-installations>

and ROC sustainability info here:

<https://www.ofgem.gov.uk/environmental-and-social-schemes/renewables-obligation-ro/applicants/biomass-sustainability>

b. **RO feedstock data**- The issuance of a ROC for a station with a TIC > 1MWe is predicated on them putting in their quarterly feedstock sustainability data (they have an additional independent yearly

audit); the issuance of a ROC between 50kWe and 1MWe is not predicated on Ofgem receiving feedstock data. Stations with a TIC < 50kWe (as well as some others under conditions not quite specified in the data) can report amalgamated feedstock data once a year, so some assumptions are made.

The sustainability dataset for the RO can be downloaded here:

<https://www.ofgem.gov.uk/publications/biomass-sustainability-dataset-2019-20>

and is the data which underlies the annual report

<https://www.ofgem.gov.uk/publications/renewables-obligation-ro-annual-report-2019-20>

This list is split into two: Land Use and GHG which is for stations over 1MW and Profiling Data which includes everyone. AD (fuel type) has to be filtered out from biomass, energy crop, gasification, pyrolysis, etc. The fuel name can be anything from 'Anaerobic Digestion' to 'AD-Straw' to 'AD-CU-13' to 'Maize Silage'. In other words, there is no consistent categorisation: someone may call something 'biogas derived from sugar beet', others 'beet', others 'sugar beet pulp'. Indeed, for most feedstocks the fuel name is sufficient; however, in the fuel name 'Anaerobic Digestion', it is necessary to go to the 'consignment' field to get further detail. Nevertheless, there are still some coded fields. The data is by quantity of biogas not by tonnage of feedstock.

### **c. Department of Energy, Food & Rural Affairs (Defra) data.**

Defra holds data on the area of crops grown for bioenergy, which is available from:

<https://www.gov.uk/government/statistics/area-of-crops-grown-for-bioenergy-in-england-and-the-uk-2008-2019>

Table G reflects DUKES data, and only shows biodiesel and bioethanol for transport fuels and not biomethane. Currently data only go to 2019 and this report was prepared using 2020 data.

Data for AD can be found here:

<https://www.gov.uk/government/statistics/area-of-crops-grown-for-bioenergy-in-england-and-the-uk-2008-2020/section-3-anaerobic-digestion>

The dataset which underlies this web page is available here:

[https://assets.publishing.service.gov.uk/government/uploads/system/uploads/attachment\\_data/file/1039249/nonfood-dataset-9dec21.ods](https://assets.publishing.service.gov.uk/government/uploads/system/uploads/attachment_data/file/1039249/nonfood-dataset-9dec21.ods)

## **References**

For numbered references in tables and text, see main article

## **Additional References**

Thauer, R.K., 2012. The Wolfe cycle comes full circle. *Proceedings of the National Academy of Sciences*, 109(38), pp.15084-15085.
