# Supplementary material for: Potential for Biomethanisation of CO2 from Anaerobic Digestion of Organic Wastes in the United Kingdom
Source: MDPI journal article supplement (doi:10.3390/pr10061202), 2022-06-16
Supplement: s1 [file s1]

Archive with 1 entries (1 files):
- processes-1773088-supplementary.pdf
